## Oxidized LDL and the Risk of Coronary Heart Disease: Results from the MONICA/KORA Augsburg Study

Wolfgang Koenig,<sup>1\*†</sup> Mahir Karakas,<sup>1†</sup> Astrid Zierer,<sup>2</sup> Christian Herder,<sup>3</sup> Jens Baumert,<sup>2</sup> Christa Meisinger,<sup>2</sup> and Barbara Thorand<sup>2</sup>

<sup>1</sup> Department of Internal Medicine II – Cardiology, University of Ulm Medical Center, Ulm, Germany; <sup>2</sup> Institute of Epidemiology II, Helmholtz Zentrum München, German Research Center for Environmental Health, Neuherberg, Germany; <sup>3</sup> Institute for Clinical Diabetology, German Diabetes Center, Leibniz Center for Diabetes Research at Heinrich Heine University, Düsseldorf, Germany; \* address correspondence to this author at: Department of Internal Medicine II – Cardiology, University of Ulm Medical Center, Albert-Einstein-Allee 23, D-89081 Ulm, Germany. Fax +49-731-500-45021; e-mail wolfgang.koenig@uniklinik-ulm.de. † These authors contributed equally to this work.

**BACKGROUND:** Oxidative stress plays a critical role in the initiation and progression of atherosclerosis. Oxidized LDL (oxLDL) is a marker of oxidative stress. We prospectively investigated whether increased serum oxLDL concentrations are associated with incident coronary heart disease (CHD).

**METHODS:** We conducted a prospective population-based case–cohort study within the MONICA/KORA Augsburg studies. Serum oxLDL concentrations were measured in 333 case individuals with incident CHD and in 1727 noncase individuals selected from a source population of 9300 middle-aged, healthy men and women. The mean (SD) follow-up time was 10.8 (4.6) years.

**RESULTS:** Baseline oxLDL concentrations were higher in case individuals than in noncase individuals ( $P < 0.001$ ). After adjustment for age, sex, survey, smoking status, systolic blood pressure, physical activity, diabetes, body mass index, parental history of myocardial infarction, and alcohol consumption, the hazard ratio (HR) for comparing the first and third tertiles was 1.87 (95% CI, 1.33–2.64;  $P < 0.001$ ). Additional adjustment for lipid parameters, inflammatory markers, and markers of endothelial dysfunction attenuated the association (HR, 1.29; 95% CI, 0.88–1.89;  $P = 0.087$ ). We observed no significant interactions between oxLDL and sex or being overweight.

**CONCLUSIONS:** Increased oxLDL concentrations were associated with an increased risk for incident CHD. Nevertheless, because this effect became nonsignificant

after adjustment for covariates, particularly the ratio of total cholesterol to HDL cholesterol, it may be mediated primarily by lipid parameters. Further studies are warranted to clarify this issue.

© 2011 American Association for Clinical Chemistry

Despite the involvement of oxidized LDL (oxLDL)<sup>4</sup> in all stages of atherosclerosis from the initiation of fatty streaks to the development of plaque instability and rupture, the potential association of systemically measured oxLDL with coronary heart disease (CHD) is still a matter of controversy (1, 2). oxLDL has been hypothesized to induce foam cell formation, an early yet critical step in the development of atherosclerosis (3). Furthermore, oxLDL downregulates endothelial nitric oxide synthase, increases the formation of metalloproteinases, and induces apoptosis in human coronary endothelial cells (4–6). Nevertheless, the data from epidemiologic studies remain controversial. Although several studies that investigated the association between circulating levels of oxidative biomarkers and CHD yielded fairly strong associations, others were not able to demonstrate any meaningful relationship with CHD (7, 8). We sought to further elucidate whether oxLDL is a predictor of incident CHD in a large prospective population-based cohort study of middle-aged men and women.

We conducted a case–cohort study that used data from the population-based MONICA/KORA (Monitoring of Trends and Determinants in Cardiovascular Diseases/Kooperative Gesundheitsforschung in der Region Augsburg) Augsburg cohort study. The study design has previously been described (9). In brief, 3 independent surveys were conducted with 13 427 participants (25–74 years of age). A combined end point that included incident fatal/nonfatal myocardial infarction (MI) and sudden cardiac death occurring before the age of 75 years was used as the outcome variable. Until 2000, the diagnosis of a major nonfatal MI event was based on the MONICA algorithm, which takes into account symptoms, cardiac enzymes, and electrocardiographic changes. After 2000, MI was diagnosed according to European Society of Cardiology and American College of Cardiology criteria. Deaths from MI were validated by autopsy reports, death certificates, chart review, and information from the last treating physician. Owing to the low incidence of CHD

<sup>4</sup> Nonstandard abbreviations: oxLDL, oxidized LDL; CHD, coronary heart disease; MONICA, Monitoring of Trends and Determinants in Cardiovascular Diseases; KORA, Kooperative Gesundheitsforschung in der Region Augsburg; MI, myocardial infarction; apo B-100, apolipoprotein B-100; sICAM-1, soluble intercellular adhesion molecule 1; HR, hazard ratio; AUC, area under the ROC curve.

in individuals <35 years old, the present study was limited to 10 718 persons between the ages of 35 and 74 years at baseline. After the exclusion of participants with self-reported prevalent CHD, the source population for the present study comprised 9300 individuals. For the case-cohort study, a random sample of the source population was selected and stratified by sex and survey. Participants with missing values for oxLDL or any of the covariables were excluded. The present analysis comprised 1079 men and 981 women.

Serum samples stored at  $-80^{\circ}\text{C}$  were used to analyze baseline oxLDL levels. Previous work by Holvoet et al. (10) has convincingly shown that oxidative biomarkers can be measured in samples that have been stored for >15 years. Serum oxLDL concentrations were measured by ELISAs from Mercodia. We used the monoclonal antibody 4E6, which is directed specifically against an epitope in the apolipoprotein B-100 (apo B-100) moiety of oxLDL that is formed from the substitution of aldehydes for lysine residues in apo B-100. The intra- and interassay CVs were <10%. All statistical analyses have been described in detail elsewhere (9). Cox proportional hazards analysis was used to assess the association between oxLDL and incident CHD by using different adjustments for classic cardiovascular risk factors. Owing to the case-cohort design, SEs and *P* values were determined by the sampling-weight approach and robust variance estimates developed by Barlow et al. [see (9) and references therein]. All evaluations were performed with the statistical software package SAS (version 9.1 for Windows; SAS Institute).

Overall, 2060 participants (333 with incident CHD and 1727 without incident CHD) were included in this study. The mean (SD) follow-up time was 10.8 (4.6) years. The baseline demographic and laboratory characteristics are shown in Table 1. The geometric mean (antilogarithm of the SE for the logarithmic mean) for oxLDL was 103.3 (1.02) U/L in case individuals and 87.8 (1.01) U/L in noncase individuals.

We calculated Pearson partial correlation coefficients between the logarithm of the oxLDL concentration, inflammatory markers, and lipid markers and found a moderate but statistically significant correlation between the logarithm of the oxLDL concentration and the logarithm of interleukin-6, the logarithm of the C-reactive protein concentration, soluble E-selectin, and soluble intercellular adhesion molecule 1 (sICAM-1). We also found a strong, significant correlation between oxLDL and total cholesterol, HDL, the total cholesterol-HDL ratio, and LDL (see Table 1 in the Data Supplement that accompanies the online version of this brief communication at <http://www.clinchem.org/content/vol57/issue8>).

Table 2 shows the results of the Cox proportional hazards analysis, in which we assessed the association of baseline oxLDL concentrations with incident CHD. Interaction analyses using likelihood ratio tests showed no significant interactions between oxLDL and sex, smoking status, or being overweight (data not shown). In age-, sex- and survey-adjusted analyses (model 1), there was a strong, statistically significant association between increased oxLDL concentrations and incident CHD [hazard ratio (HR) for third tertile vs first tertile, 2.30; 95% CI, 1.67–3.16; *P* for trend, <0.001]. After further adjustment for traditional cardiovascular risk factors (model 2), as well as for the total cholesterol-HDL ratio (model 3) and for inflammatory markers (C-reactive protein and interleukin-6) plus markers of endothelial dysfunction (sICAM-1 and soluble E-selectin) (model 4), the effect was attenuated but still statistically significant (Table 2). With full adjustment for all of these parameters (model 5), the effect was weakened and became statistically nonsignificant (HR, 1.29; 95% CI, 0.88–1.89; *P* for trend, 0.087).

Furthermore, Table 2 shows that the predictive accuracy in the diagnosis of incident CHD, as quantified by the area under the ROC curve (AUC), was increased by oxLDL in the basic models, whereas the effect was lost in the fully adjusted model. This finding was confirmed by the 2 other measures of accuracy (integrated discrimination improvement, net reclassification index), which showed only a marginal additional contribution of oxLDL in predicting CHD events.

The present report represents the largest single study to date on the relationship of oxLDL concentration to incident CHD. Despite several reports linking oxLDL to stable CHD (11), a higher Framingham risk score (12), and the number and size of plaques (13), further prospective data on the association of oxLDL with subsequent coronary events are sparse. In a previous prospective nested case-control study of initially healthy men, we compared plasma oxLDL concentrations for 88 cases and 258 matched controls (7). Baseline plasma oxLDL concentrations were significantly higher in men who subsequently experienced a coronary event than in the matched controls [mean (SD), 110 (32) U/L vs 93 (28) U/L; *P* ≤ 0.001], and the HR for future CHD events (comparing the first and third tertiles) was 2.79 (95% CI, 1.21–6.42) after adjustment for traditional cardiovascular risk factors, C-reactive protein, and conventional lipid markers. Two additional studies of patients without preexisting vascular disease yielded discrepant results. Wu et al. identified 266 male and 235 female patients from 2 populations who were matched with 2 controls each and reported a moderate but statistically significant association be-

**Table 1. Baseline demographic, clinical, and laboratory characteristics of study participants with and without incident CHD during follow-up (n = 2060).<sup>a</sup>**

| Characteristic                                    | CHD case individuals (n = 333) | Non-CHD individuals (n = 1727) | P      |
|---------------------------------------------------|--------------------------------|--------------------------------|--------|
| Age, years <sup>b</sup>                           | 57.3 (0.44)                    | 52.3 (0.26)                    | <0.001 |
| Education <12 years, %                            | 79.3 (2.6)                     | 76.5 (1.5)                     | 0.271  |
| Smoking status, %                                 |                                |                                | <0.001 |
| Current smoker                                    | 38.8 (3.1)                     | 23.4 (1.5)                     |        |
| Former smoker                                     | 33.6 (3.0)                     | 28.4 (1.6)                     |        |
| Never smoker                                      | 27.5 (2.8)                     | 48.3 (1.7)                     |        |
| Frequency of exercise, %                          |                                |                                | <0.001 |
| Inactive                                          | 72.3 (2.8)                     | 61.1 (1.7)                     |        |
| Alcohol consumption, % <sup>c</sup>               |                                |                                | 0.255  |
| 0/0 g/day                                         | 29.5 (2.9)                     | 31.6 (1.6)                     |        |
| <0–39.9/0–19.9 g/day                              | 39.8 (3.1)                     | 42.5 (1.7)                     |        |
| ≥40/≥20 g/day                                     | 30.7 (2.9)                     | 25.9 (1.5)                     |        |
| Body mass index, kg/m <sup>2b</sup>               | 28.4 (0.23)                    | 27.1 (0.10)                    | <0.001 |
| Waist-to-hip ratio <sup>b,d</sup>                 | 0.929 (0.005)                  | 0.868 (0.002)                  | <0.001 |
| Parental history of MI, %                         |                                |                                | 0.015  |
| Positive                                          | 23.2 (2.7)                     | 20.0 (1.4)                     |        |
| Unknown                                           | 26.7 (2.8)                     | 21.1 (1.4)                     |        |
| Negative                                          | 50.1 (3.1)                     | 58.9 (1.7)                     |        |
| History of hypertension or actual hypertension, % | 65.1 (3.0)                     | 41.2 (1.7)                     | <0.001 |
| Systolic blood pressure, mmHg <sup>b</sup>        | 142.9 (1.15)                   | 133.6 (0.47)                   | <0.001 |
| Diastolic blood pressure, mmHg <sup>b</sup>       | 83.6 (0.68)                    | 81.5 (0.27)                    | 0.004  |
| Prevalent diabetes, %                             | 18.3 (2.4)                     | 4.4 (0.7)                      | <0.001 |
| Current HRT, % <sup>e,f</sup>                     | 5.5 (1.4)                      | 10.4 (1.1)                     | 0.109  |
| TC/HDL ratio <sup>b</sup>                         | 5.74 (0.12)                    | 4.51 (0.04)                    | <0.001 |
| C-reactive protein, mg/L <sup>g</sup>             | 2.53 (1.06)                    | 1.44 (1.03)                    | <0.001 |
| IL-6, pg/mL <sup>g</sup>                          | 3.15 (1.05)                    | 2.00 (1.03)                    | <0.001 |
| sICAM-1, ng/mL <sup>b</sup>                       | 872.0 (19.1)                   | 755.9 (6.9)                    | <0.001 |
| sE-selectin, ng/mL <sup>b</sup>                   | 65.9 (2.08)                    | 55.3 (0.65)                    | <0.001 |
| oxLDL, U/L <sup>g</sup>                           | 103.3 (1.02)                   | 87.8 (1.01)                    | <0.001 |

<sup>a</sup> Data for categorical variables are expressed as weighted percentages. Differences between groups were evaluated with the  $\chi^2$  test. The expression and statistical analysis of other data are as indicated. Sampling weights in analyses are as follows: cases = all cases/nonmissing cases; noncases = 1/sampling fraction, with sampling fraction being equal to the subcohort/full cohort without cases for each sex and survey.

<sup>b</sup> Data for normally distributed continuous variables are expressed as the weighted mean (SE). Differences between groups were evaluated with the t-test.

<sup>c</sup> Alcohol-consumption groups for men and women are presented as follows: (amount consumed daily for men)/(amount consumed daily for women).

<sup>d</sup> Measured only in participants of surveys 2 and 3 (case individuals, n = 229; noncase individuals, n = 1170).

<sup>e</sup> HRT, hormone-replacement therapy; TC/HDL ratio, total cholesterol–HDL ratio; IL-6, interleukin-6; sE-selectin, soluble E-selectin.

<sup>f</sup> Only for women  $\geq 50$  years of age (case individuals, n = 68; noncase individuals, n = 517) with no current use of oral contraceptives.

<sup>g</sup> Skewed continuous variables are expressed as the weighted geometric mean (antilogarithm of the SE of the logarithmic mean).

tween oxLDL concentration and CHD risk, which was attenuated and no longer predictive after adjustment for standard lipid variables (8). In contrast, Nordin Fredrikson et al. showed in a small nested case-control study in 2003 that an increased circulating oxLDL concentration at baseline was associated with a higher risk of cardiovascular disease (14); however,

this small prospective study, which analyzed 26 individuals per group, lacked the power to control for all potential confounders and in particular did not adjust for lipid markers.

In the present prospective population-based study, we found oxLDL to be positively associated with the risk of incident CHD. This association became

**Table 2. HRs for incident CHD according to baseline oxLDL concentrations.**

|                      | oxLDL tertile |                  |                  | P for trend | AUC without oxLDL | AUC with oxLDL | IDI <sup>a</sup> | NRI   |
|----------------------|---------------|------------------|------------------|-------------|-------------------|----------------|------------------|-------|
|                      | T1            | T2, HR (95% CI)  | T3, HR (95% CI)  |             |                   |                |                  |       |
| Model 1 <sup>b</sup> | 1.0           | 1.18 (0.83–1.67) | 2.30 (1.67–3.16) | <0.001      | 0.799             | 0.808          | 0.007            | 0.086 |
| Model 2 <sup>c</sup> | 1.0           | 1.08 (0.74–1.56) | 1.87 (1.33–2.64) | <0.001      | 0.831             | 0.835          | –0.001           | 0.026 |
| Model 3 <sup>d</sup> | 1.0           | 0.99 (0.69–1.41) | 1.50 (1.06–2.13) | 0.009       | 0.816             | 0.818          | 0.001            | 0.031 |
| Model 4 <sup>e</sup> | 1.0           | 1.03 (0.71–1.48) | 1.88 (1.35–2.61) | <0.001      | 0.822             | 0.827          | 0.004            | 0.055 |
| Model 5 <sup>f</sup> | 1.0           | 0.89 (0.60–1.30) | 1.29 (0.88–1.89) | 0.087       | 0.845             | 0.845          | –0.003           | 0.015 |

<sup>a</sup> IDI, integrated discrimination improvement; NRI, net reclassification index; T1, tertile 1.  
<sup>b</sup> Adjustment for age, sex, and survey.  
<sup>c</sup> Adjustment for age, sex, survey, smoking status, systolic blood pressure, physical activity, diabetes, body mass index, parental history of MI, and alcohol consumption.  
<sup>d</sup> Adjustment for age, sex, survey, and total cholesterol–HDL ratio.  
<sup>e</sup> Adjustment for age, sex, survey, C-reactive protein, interleukin-6, sICAM-1, and soluble E-selectin.  
<sup>f</sup> Adjustment for age, sex, survey, smoking status, systolic blood pressure, physical activity, diabetes, body mass index, parental history of MI, alcohol consumption, total cholesterol–HDL ratio, C-reactive protein, interleukin-6, sICAM-1, and soluble E-selectin.

nonsignificant after adjustment for various established cardiovascular risk factors and additional markers of subclinical inflammation. Although the incremental value in the AUC observed with oxLDL was small, it still could be clinically important, given the relative insensitivity of the AUC for detecting moderately sized effects. For example, even widely established cardiovascular risk factors, such as systolic blood pressure and cholesterol, are associated with small incremental gains in the AUC for predicting cardiovascular events (15).

Recently, Zeibig et al. reported that oxLDL influences the mechanical stability of atherosclerotic plaques (16). Repeated systemic administration of Fc-CD68, a new oxLDL-binding protein, significantly reduced the occurrence of spontaneous ruptures of established plaques in ApoE<sup>−/−</sup> mice by 20%, and drastically increased the collagen content of plaques. Pertinent to antigen-induced anti-oxLDL antibodies, recombinant anti-oxLDL antibodies were recently shown to reduce the progression of atherosclerosis and plaque inflammation in ApoE<sup>−/−</sup> and Apobec-1<sup>−/−</sup>/LDL receptor<sup>−/−</sup> mice, respectively (17, 18).

Several limitations of our study need to be addressed. First, oxLDL concentrations were significantly correlated with measures of subclinical inflammation; however, regression diagnostics revealed no collinearity in the final models. Second, the number of female cases was considerably lower than the number of male cases; however, no interactions between oxLDL tertiles were seen in likelihood ratio tests. Third, the total circulating oxLDL may be indicative not only of the extent of atherosclerosis but also of oxidative processes in remote tissues,

such as adipose tissues. Nevertheless, no significant interactions of oxLDL with being overweight were found.

Our study also has several strengths, including its population-based prospective design, the large number of incident cases, the simultaneous measurement of oxidative and inflammatory factors, a long follow-up period, minimization of the likelihood of survival bias because both fatal and nonfatal coronary events were included, and careful adjustment for conventional and several emerging risk factors by using multivariable methods.

In this large prospective case-cohort study, increased oxLDL concentrations did not remain independently predictive of incident coronary events after adjustment for lipid markers and markers of inflammation/endothelial dysfunction. A considerable portion of the effects of oxLDL on CHD seems to be mediated by lipid parameters. Large studies are warranted to further evaluate this issue.

**Author Contributions:** All authors confirmed they have contributed to the intellectual content of this paper and have met the following 3 requirements: (a) significant contributions to the conception and design, acquisition of data, or analysis and interpretation of data; (b) drafting or revising the article for intellectual content; and (c) final approval of the published article.

**Authors' Disclosures or Potential Conflicts of Interest:** Upon manuscript submission, all authors completed the Disclosures of Potential Conflict of Interest form. Potential conflicts of interest:

**Employment or Leadership:** None declared.

**Consultant or Advisory Role:** None declared.

**Stock Ownership:** None declared.

**Honoraria:** None declared.

**Research Funding:** This study was supported by research grants from the German Research Foundation (TH-784/2-1 and TH-784/2-2) and by additional funds provided by the University of Ulm; the Federal Ministry of Health; the Ministry of Innovation, Science, Research and Technology of the state North Rhine-Westphalia; and the Helmholtz Zentrum München, German Research Center for Environmental Health, Neuherberg (formerly GSF National Research Center for Environment and Health). The MONICA/KORA Augsburg cohort study was financed by the Helmholtz Zentrum München and supported by grants from the Federal Ministry of Education and Research, Berlin.

**Expert Testimony:** None declared.

**Role of Sponsor:** The funding organizations played no role in the design of study, choice of enrolled patients, review and interpretation of data, or preparation or approval of manuscript.

**Acknowledgments:** We thank all members of the Institute of Epidemiology at the Helmholtz Zentrum München and the field staff in Augsburg who were involved in the planning and conduct of the MONICA/KORA Augsburg studies. Furthermore, we thank Gerlinde Trischler (University of Ulm) for excellent technical assistance and Lloyd Chambless (School of Public Health, University of North Carolina at Chapel Hill, Chapel Hill, NC) for assistance with the statistical analysis of the case-cohort data set. Finally, we express our appreciation to all study participants.

## References

1. Hansson GK. Inflammation, atherosclerosis, and coronary artery disease. *N Engl J Med* 2005;352:1685–95.
2. Navab M, Ananthramiah GM, Reddy ST, Van Lenten BJ, Ansell BJ, Fonarow GC, et al. The oxidation hypothesis of atherogenesis: the role of oxidized phospholipids and HDL. *J Lipid Res* 2004;45:993–1007.
3. Glass CK, Witztum JL. Atherosclerosis. The road ahead. *Cell* 2001;104:503–16.
4. Tsimikas S. Oxidative biomarkers in the diagnosis and prognosis of cardiovascular disease. *Am J Cardiol* 2006;98:9P–17P.
5. Daugherty A, Dunn JL, Rateri DL, Heinecke JW. Myeloperoxidase, a catalyst for lipoprotein oxidation, is expressed in human atherosclerotic lesions. *J Clin Invest* 1994;94:437–44.
6. Sugiyama S, Okada Y, Sukhova GK, Virmani R, Heinecke JW, Libby P. Macrophage myeloperoxidase regulation by granulocyte macrophage colony-stimulating factor in human atherosclerosis and implications in acute coronary syndromes. *Am J Pathol* 2001;158:879–91.
7. Meisinger C, Baumert J, Khuseyinova N, Loewel H, Koenig W. Plasma oxidized low-density lipoprotein, a strong predictor for acute coronary heart disease events in apparently healthy, middle-aged men from the general population. *Circulation* 2005;112:651–7.
8. Wu T, Willett WC, Rifai N, Shai I, Manson JE, Rimm EB. Is plasma oxidized low-density lipoprotein, measured with the widely used antibody 4E6, an independent predictor of coronary heart disease among U.S. men and women? *J Am Coll Cardiol* 2006;48:973–9.
9. Karakas M, Zierer A, Herder C, Baumert J, Meisinger C, Koenig W, Thorand B. Leptin, adiponectin, their ratio and risk of coronary heart disease: results from the MONICA/KORA Augsburg Study 1984–2002. *Atherosclerosis* 2010;209:220–5.
10. Holvoet P, Macy E, Landeloos M, Jones D, Jenny NS, Van de Werf F, Tracy RP. Analytical performance and diagnostic accuracy of immunometric assays for the measurement of circulating oxidized LDL. *Clin Chem* 2006;52:760–4.
11. Imazu M, Ono K, Tadehara F, Kajiwara K, Yamamoto H, Sumii K, et al. Plasma levels of oxidized low density lipoprotein are associated with stable angina pectoris and modalities of acute coronary syndrome. *Int Heart J* 2008;49:515–24.
12. Wilson PW, Ben-Yehuda O, McNamara J, Massaro J, Witztum J, Reaven PD. Autoantibodies to oxidized LDL and cardiovascular risk: the Framingham Offspring study. *Atherosclerosis* 2006;189:364–8.
13. Holvoet P, Jenny NS, Schreiner PJ, Tracy RP, Jacobs DR, for the Multi-Ethnic Study of Atherosclerosis. The relationship between oxidized LDL and other cardiovascular risk factors and subclinical CVD in different ethnic groups: the Multi-Ethnic Study of Atherosclerosis (MESA). *Atherosclerosis* 2007;194:245–52.
14. Nordin Fredrikson G, Hedblad B, Berglund G, Nilsson J. Plasma oxidized LDL: a predictor for acute myocardial infarction? *J Intern Med* 2003;253:425–9.
15. Cook NR. Use and misuse of the receiver operating characteristic curve in risk prediction. *Circulation* 2007;115:928–35.
16. Zeibig S, Wagner S, Holthoff HP, Ungerer M, Bültmann A, Uhland K, et al. Effect of the oxLDL binding protein Fc-CD68 on plaque extension and vulnerability in atherosclerosis. *Circ Res* 2011;108:695–703.
17. Schiopu A, Bengtsson J, Söderberg I, Janciauskiene S, Lindgren S, Ares MPS, et al. Recombinant human antibodies against aldehyde-modified apolipoprotein B-100 peptide sequences inhibit atherosclerosis. *Circulation* 2004;110:2047–52.
18. Schiopu A, Frendeus B, Jansson B, Söderberg I, Ljungcrantz I, Araya Z, et al. Recombinant antibodies to an oxidized low-density lipoprotein epitope induce rapid regression of atherosclerosis in *Apobec-1*<sup>-/-</sup> low-density lipoprotein receptor<sup>-/-</sup> mice. *J Am Coll Cardiol* 2007;50:2313–8.

Previously published online at  
DOI: 10.1373/clinchem.2011.165134
